# Supplementary material
Source: Springer Nature journal article supplement (https://www.springermedizin.de/resource/supplementary/12913_2013_3118_MOESM3_ESM.pdf/9532462)
Supplement: MOESM3 [file 9532462]

**A** Condition 1:  
High risk for CHD events  
N = 6,615; prevalence = 49%

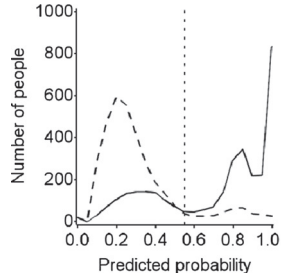

**B** Condition 2:  
Very high risk for CHD events  
N = 6,615; prevalence = 14%

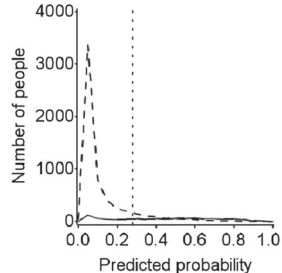

**C** Condition 3:  
Framingham risk score >20%  
N = 3,720; prevalence = 9%

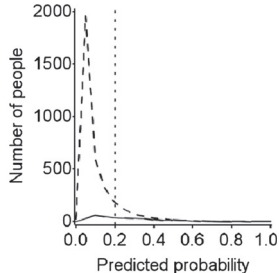

**D** Condition 4:  
LDL cholesterol  $\geq 100$  mg/dL  
N = 1,583; prevalence = 30%

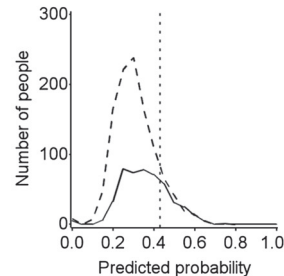

**E** Condition 5:  
LDL cholesterol  $\geq 70$  mg/dL  
N = 1,583; prevalence = 80%

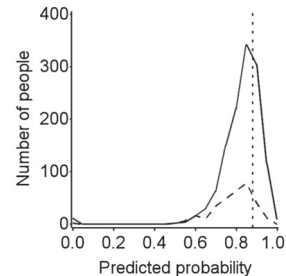

— Condition present  
- - - Condition absent  
⋮ Predicted probability  
threshold for 90%  
specificity
